# Supplementary material for: A flexible self-charging sodium-ion full battery for self-powered wearable electronics
Source: Royal Society of Chemistry journal article supplement (doi:10.1039/d0ta05006g), 2020-01-01
Supplement: d0ta05006g1.pdf [file d0ta05006g1.pdf]

## Supporting Information

### **Flexible self-charging sodium-ion full battery for self-powered wearable electronics**

*Dan Zhou<sup>1</sup>, Taotao Yang<sup>2</sup>, Jiaqi Yang<sup>3</sup> and Li-zhen Fan<sup>1</sup>*

<sup>1</sup> Center for Green Innovation, School of Mathematics and Physics & Beijing Advanced Innovation Center for Materials Genome Engineering, Institute of Advanced Materials and Technology, University of Science and Technology Beijing, Beijing 100083, China

<sup>2</sup> Basic Experimental Center for Natural Science, University of Science and Technology Beijing, Beijing 100083, China

<sup>3</sup> Office of Educational Administration, Shenyang Open University, Shenyang 110003, China

\* Corresponding author. [zhoudan@ustb.edu.cn](mailto:zhoudan@ustb.edu.cn); [fanlizhen@ustb.edu.cn](mailto:fanlizhen@ustb.edu.cn) (L.-Z. Fan).

**Preparation of  $\text{Na}_3\text{V}_2(\text{PO}_4)_3@\text{C}$ :** The  $\text{Na}_3\text{V}_2(\text{PO}_4)_3@\text{C}$  composite was synthesized via a sol-gel method combined with a carbonization process. Initially, the stoichiometric of precursors of NaOH,  $\text{NH}_4\text{VO}_3$  and  $\text{NH}_4\text{H}_2\text{PO}_4$  were well dissolved in 300 mL of deionized water, followed by adding 12 g of citric acid that used as chelating reagent and carbon source. Subsequently, the obtained mixture was magnetically stirred at 90 °C until the internal water was fully evaporated, yielding to a black gel. After that, the black gel was dried in a vacuum oven at 80 °C for 24 h to form a xerogel. Finally, the xerogel was milled, followed by pre-annealed at 300 °C for 5 h and second-heated at 850 °C for 8 h in Ar flow, obtaining the desired  $\text{Na}_3\text{V}_2(\text{PO}_4)_3@\text{C}$  composite.

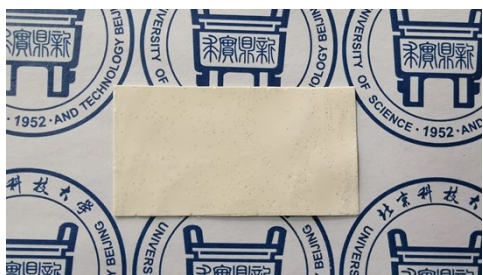

**Fig. S1** Optical image of the as-prepared BaTiO<sub>3</sub>-P(VDF-HFP) gel-polymer film.

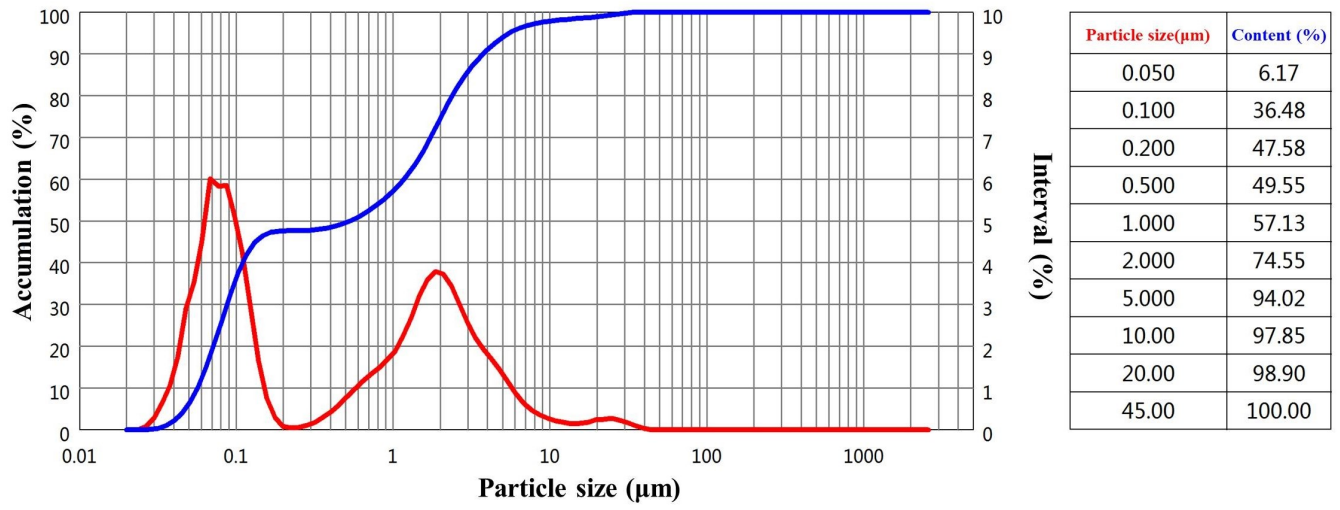

**Fig. S2** Dimension distribution of BaTiO<sub>3</sub> piezoelectric particles.

**Table S1** Atomic ratio and mass distribution of the  $\text{Na}_3\text{V}_2(\text{PO}_4)_3@\text{C}$  cathode material by XPS analysis

| <b>Element name</b>     | <b>C</b>     | <b>Na</b>   | <b>V</b>     | <b>P</b>     | <b>O</b>     |
|-------------------------|--------------|-------------|--------------|--------------|--------------|
| <b>Atomic ratio (%)</b> | <b>45.95</b> | <b>6.30</b> | <b>4.21</b>  | <b>7.30</b>  | <b>36.25</b> |
| <b>Mass ratio (%)</b>   | <b>32.14</b> | <b>8.43</b> | <b>12.49</b> | <b>13.17</b> | <b>33.77</b> |

**Table S2** Atomic ratio and mass distribution of the hard carbon anode material by XPS analysis

| <b>Element name</b>     | <b>C</b>     | <b>O</b>    |
|-------------------------|--------------|-------------|
| <b>Atomic ratio (%)</b> | <b>97.63</b> | <b>2.37</b> |
| <b>Mass ratio (%)</b>   | <b>96.86</b> | <b>3.14</b> |

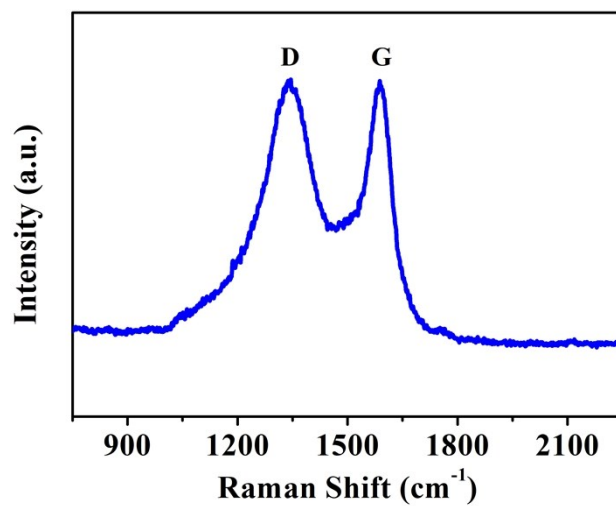

**Fig. S3** Raman spectrum of the hard carbon anode material.

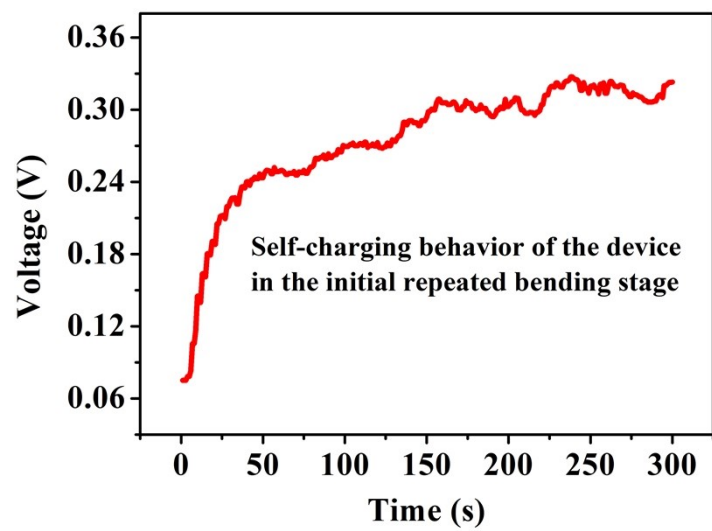

**Fig. S4** Self-charging behavior of the flexible SCSFB in the initial repeated bending stage.



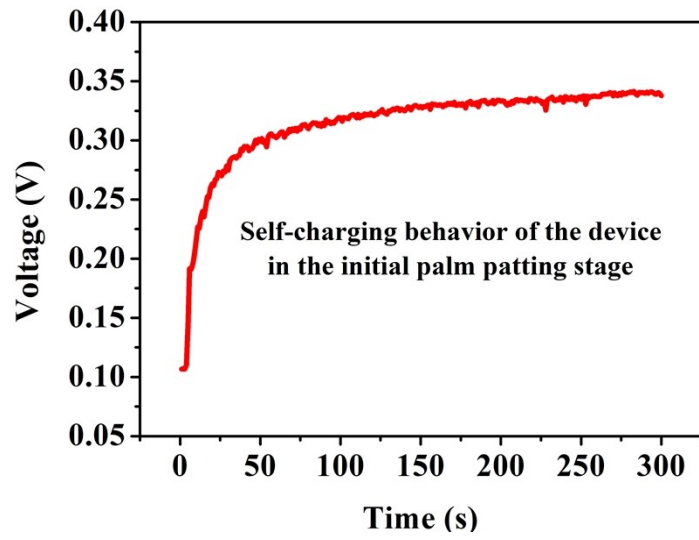

**Fig. S5** Self-charging behavior of the flexible SCSFB in the initial palm patting stage.

**Table S3** Self-charging voltage of similar energy device using various built-in piezoelectric materials.

| Device         | Piezoelectric materials        | Self-charging voltage                               | Ref.         |
|----------------|--------------------------------|-----------------------------------------------------|--------------|
| SCPC           | PVDF                           | 0.395 V (periodic compression)                      | [1]          |
| SCPC           | PVDF–PZT                       | ~ 0.3 V (periodic compression)                      | [2]          |
| SCASC          | Fish swim bladder              | 0.281 V (finger imparting)                          | [3]          |
| Flexible SCPCs | PVDF                           | 0.22 V (periodic compression)                       | [4]          |
| SCSPC          | PVDF-ZnO                       | 0.145 V (palm patting)                              | [5]          |
| SCSPC          | Porous PVDF                    | 0.112 (compression)                                 | [6]          |
| Flexible SCSFB | BaTiO <sub>3</sub> -P(VDF-HFP) | 0.4 V (repeated bending);<br>0.46 V (palm patting); | This<br>work |

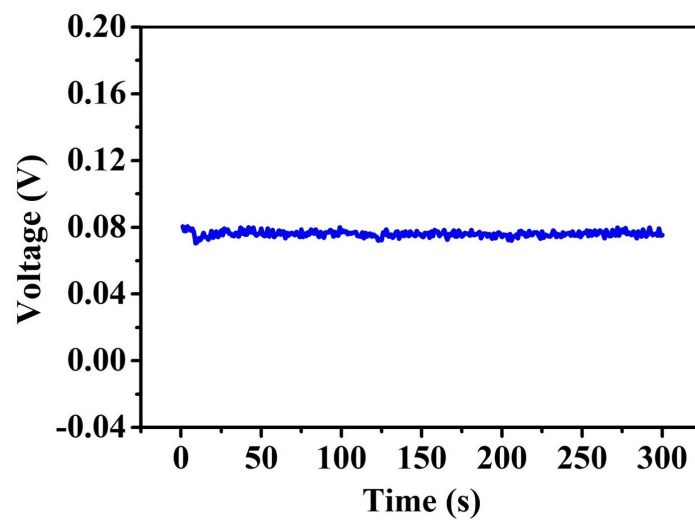

**Fig. S6** Voltage curve of a device assembled with unpolarized piezoelectric gel-electrolyte film under palm patting for 300 s.

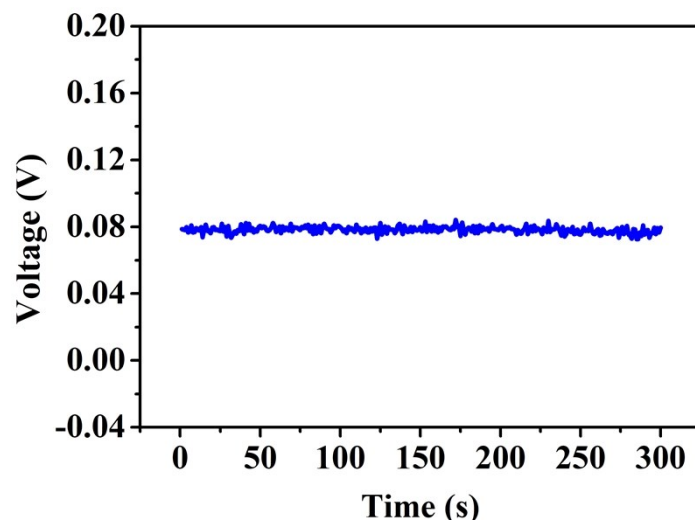

**Fig. S7** Voltage curve of a device assembled with pure P(VDF-HFP) gel-electrolyte film under palm patting for 300 s.

## References

- [1] X. Y. Xue, S. H. Wang, W. X. Guo, Y. Zhang and Z. L. Wang, *Nano Lett.*, 2012, **12**, 5048–5054.
- [2] Y. Zhang, Y. J. Zhang, X. Y. Xue, C. X. Cui, B. He, Y. X. Nie, P. Deng and Z. L. Wang, *Nanotechnology*, 2014, **25**, 105401.
- [3] A. Maitra, S. K. Karan, S. Paria, A. K. Das, R. Bera, L. Halder, S. K. Si, A. Bera and B. B. Khatua, *Nano Energy*, 2017, **40**, 633–645.
- [4] H. X. He, Y. M. Fu, T. M. Zhao, X. C. Gao, L. L. Xing, Y. Zhang and X. Y. Xue, *Nano Energy*, 2017, **39**, 590–600.
- [5] A. Ramadoss, B. Saravanakumar, S. W. Lee, Y.-S. Kim, S. J. Kim and Z. L. Wang, *ACS Nano*, 2015, **9**, 4337–4345.
- [6] S. Sahoo, K. Krishnamoorthy, P. Pazhamalai, V. K. Mariappan, S. Manoharan and S.-J. Kim, *J. Mater. Chem. A*, 2019, **7**, 21693–21703.
